# Supplementary material
Source: Springer Nature journal article supplement (https://www.springermedizin.de/resource/supplementary/12933_2013_757_MOESM2_ESM.pdf/9538914)
Supplement: MOESM2 [file 9538914]

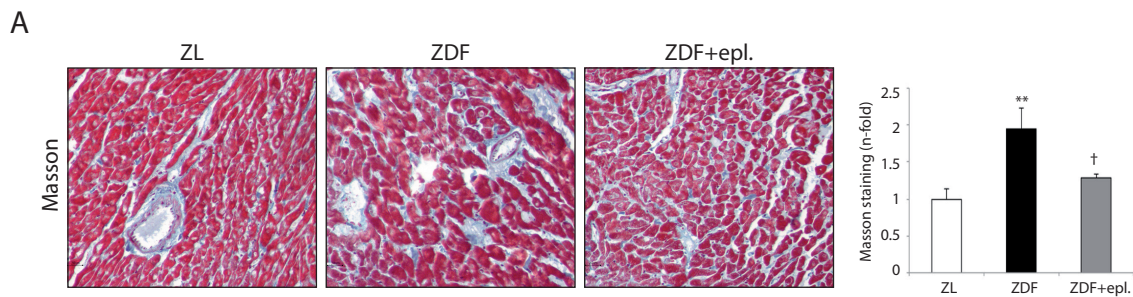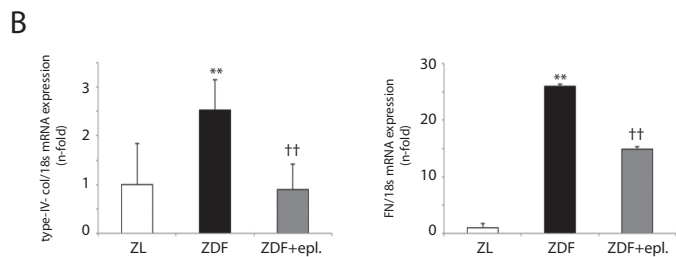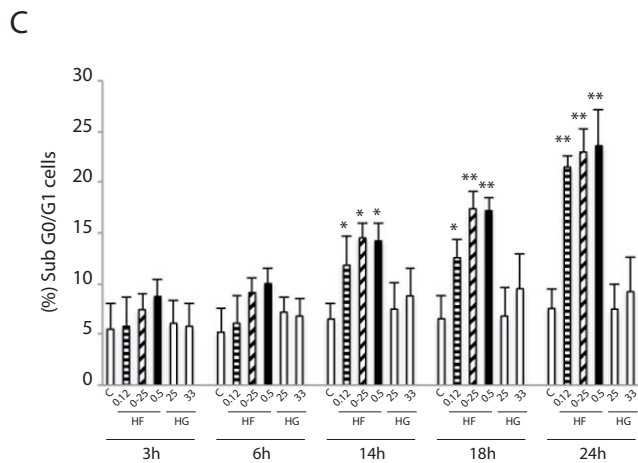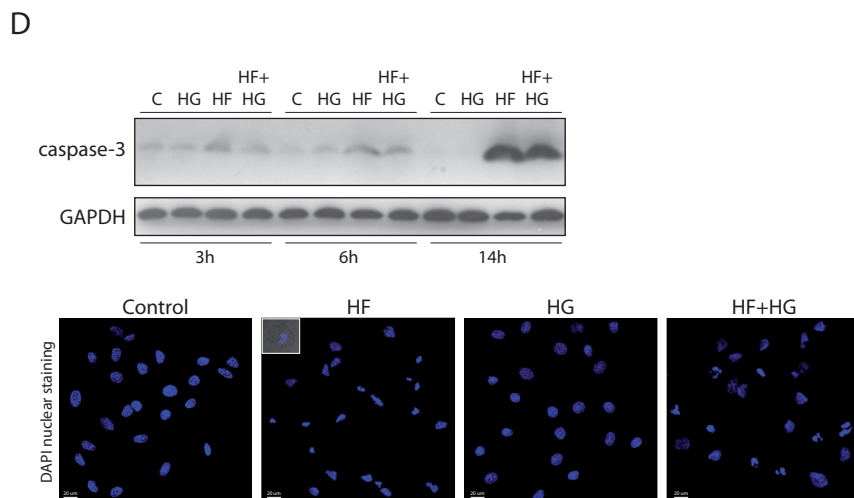

Suppl. Figure 1.
